# Supplementary material for: Starch Molecular Structural Features and Volatile Compounds Affecting the Sensory Properties of Polished Australian Wild Rice
Source: MDPI journal article supplement (doi:10.3390/foods11040511), 2022-02-10
Supplement: s1 [file s1]

Table S1. Volatile components identified and semi-quantified by HS-SPME-GC/MS among AWR and CR grains<sup>1, 2</sup>.

| No | Compound name                       | Similarity (%) | Category    | Retention time (min) | Aroma Description <sup>3-18</sup>                            | Odour threshold (ng·L <sup>-1</sup> in air) <sup>3-18</sup> | Australian Wild rice (ng/g) | Sushi (ng/g)             | Doongara (ng/g)         | Sona Masoori (ng/g)     | Ponni Raw (ng/g)           | Paella (ng/g)           | Long grain (ng/g)       | Australian Medium grain (ng/g) |
|----|-------------------------------------|----------------|-------------|----------------------|--------------------------------------------------------------|-------------------------------------------------------------|-----------------------------|--------------------------|-------------------------|-------------------------|----------------------------|-------------------------|-------------------------|--------------------------------|
| 1  | cyclotetrasiloxane, octamethyl      | 87             | Other       | 4.70                 | -                                                            | -                                                           | 2.4 ± 0.4 <sup>bc</sup>     | 3.0 ± 0.1 <sup>b</sup>   | 1.8 ± 0.1 <sup>cd</sup> | 3.7 ± 1.0 <sup>a</sup>  | 2.2 ± 0.1 <sup>c</sup>     | 2.4 ± 0.0 <sup>bc</sup> | 1.5 ± 0.0 <sup>d</sup>  | 1.3 ± 0.2 <sup>d</sup>         |
| 2  | undecane                            | 73             | Hydrocarbon | 4.84                 | Milky                                                        | 5600                                                        | 0.9 ± 0.0 <sup>d</sup>      | 2.1 ± 0.1 <sup>a</sup>   | 1.5 ± 0.1 <sup>b</sup>  | 1.1 ± 0.1 <sup>c</sup>  | 0.0 ± 0.0 <sup>f</sup>     | 1.0 ± 0.1 <sup>cd</sup> | 0.0 ± 0.0 <sup>f</sup>  | 0.5 ± 0.0 <sup>e</sup>         |
| 3  | furfural                            | 78             | Aldehyde    | 4.94                 | Cooked rice, nutty, roasted, sweet                           | 2800                                                        | 1.4 ± 0.3 <sup>cd</sup>     | 1.9 ± 0.1 <sup>a</sup>   | 1.1 ± 0.2 <sup>de</sup> | 1.9 ± 0.0 <sup>a</sup>  | 1.6 ± 0.0 <sup>bc</sup>    | 1.7 ± 0.0 <sup>ab</sup> | 1.2 ± 0.2 <sup>de</sup> | 1.1 ± 0.1 <sup>e</sup>         |
| 4  | hexanal                             | 79             | Aldehyde    | 5.70                 | Fruity, grass, green, green tomato, grass-like               | 1.1                                                         | 0.0 ± 0.0 <sup>d</sup>      | 60.7 ± 4.1 <sup>a</sup>  | 30.7 ± 2.2 <sup>b</sup> | 2.1 ± 1.0 <sup>d</sup>  | 17.2 ± 0.9 <sup>c</sup>    | 1.6 ± 0.6 <sup>d</sup>  | 1.6 ± 0.0 <sup>d</sup>  | 0.8 ± 0.2 <sup>d</sup>         |
| 5  | 3,7,11-trimethyl-1-dodecanol        | 70             | Alcohol     | 6.07                 | Rubbery, paint-like                                          | -                                                           | 0.0 ± 0.0 <sup>e</sup>      | 27.1 ± 0.8 <sup>a</sup>  | 27.4 ± 1.6 <sup>a</sup> | 1.9 ± 0.9 <sup>c</sup>  | 16.3 ± 2.3 <sup>b</sup>    | 1.0 ± 0.0 <sup>c</sup>  | 0.0 ± 0.0 <sup>c</sup>  | 0.4 ± 0.0 <sup>c</sup>         |
| 6  | 2-heptenal                          | 61             | Aldehyde    | 6.49                 | Herbaceous, fatty, green                                     | 56                                                          | 0.0 ± 0.0 <sup>e</sup>      | 0.9 ± 0.2 <sup>d</sup>   | 1.6 ± 0.2 <sup>c</sup>  | 2.4 ± 0.0 <sup>b</sup>  | 0.0 ± 0.0 <sup>e</sup>     | 2.8 ± 0.0 <sup>a</sup>  | 0.8 ± 0.1 <sup>d</sup>  | 1.6 ± 0.2 <sup>c</sup>         |
| 7  | dodecanal                           | 68             | Aldehyde    | 6.83                 | Minty, soapy                                                 | 33                                                          | 1.5 ± 0.3 <sup>bc</sup>     | 1.7 ± 0.2 <sup>abc</sup> | 0.0 ± 0.0 <sup>e</sup>  | 2.0 ± 0.1 <sup>ab</sup> | 2.2 ± 0.5 <sup>a</sup>     | 1.3 ± 0.3 <sup>cd</sup> | 1.3 ± 0.3 <sup>cd</sup> | 0.9 ± 0.2 <sup>d</sup>         |
| 8  | dihydro-5-pentyl-2(3h)-furanone     | 76             | Ketone      | 7.34                 | Sweet fruity                                                 | -                                                           | 0.0 ± 0.0 <sup>d</sup>      | 2.6 ± 0.1 <sup>a</sup>   | 0.0 ± 0.0 <sup>d</sup>  | 2.6 ± 0.2 <sup>a</sup>  | 1.2 ± 0.2 <sup>b</sup>     | 1.4 ± 0.1 <sup>b</sup>  | 1.4 ± 0.3 <sup>b</sup>  | 0.6 ± 0.0 <sup>c</sup>         |
| 9  | dodecane                            | 80             | Hydrocarbon | 8.16                 | Gasoline like                                                | 770                                                         | 0.0 ± 0.0 <sup>d</sup>      | 1.5 ± 0.2 <sup>b</sup>   | 1.7 ± 0.2 <sup>b</sup>  | 2.0 ± 0.1 <sup>a</sup>  | 0.0 ± 0.0 <sup>d</sup>     | 0.8 ± 0.2 <sup>c</sup>  | 0.7 ± 0.1 <sup>c</sup>  | 0.6 ± 0.1 <sup>c</sup>         |
| 10 | 5-tridecene, (z)-                   | 65             | Hydrocarbon | 8.41                 | -                                                            | -                                                           | 2.8 ± 0.8 <sup>a</sup>      | 0.0 ± 0.0 <sup>e</sup>   | 1.1 ± 0.2 <sup>cd</sup> | 1.4 ± 0.1 <sup>c</sup>  | 0.0 ± 0.0 <sup>e</sup>     | 2.1 ± 0.2 <sup>b</sup>  | 0.8 ± 0.1 <sup>d</sup>  | 0.8 ± 0.2 <sup>d</sup>         |
| 11 | 2-methoxy-phenol                    | 62             | Phenol      | 9.48                 | Smoky-like                                                   | 13 <sup>**</sup>                                            | 1.5 ± 0.2 <sup>b</sup>      | 2.5 ± 0.4 <sup>b</sup>   | 1.9 ± 0.3 <sup>b</sup>  | 6.1 ± 0.8 <sup>b</sup>  | 1400.5 ± 19.3 <sup>a</sup> | 2.6 ± 0.6 <sup>b</sup>  | 1.7 ± 0.1 <sup>b</sup>  | 2.0 ± 0.1 <sup>b</sup>         |
| 12 | cis-vaccenic acid                   | 72             | Acid        | 10.02                | -                                                            | -                                                           | 10.3 ± 0.4 <sup>a</sup>     | 1.6 ± 0.6 <sup>b</sup>   | 10.6 ± 0.1 <sup>a</sup> | 0.0 ± 0.0 <sup>c</sup>  | 0.0 ± 0.0 <sup>c</sup>     | 10.5 ± 0.2 <sup>a</sup> | 10.4 ± 0.1 <sup>a</sup> | 10.6 ± 0.2 <sup>a</sup>        |
| 13 | octadecane, 1-(ethenyl)-            | 74             | Other       | 10.38                | -                                                            | -                                                           | 5.2 ± 0.1 <sup>b</sup>      | 7.0 ± 1.0 <sup>a</sup>   | 4.1 ± 0.4 <sup>c</sup>  | 5.5 ± 0.1 <sup>b</sup>  | 4.2 ± 0.3 <sup>c</sup>     | 2.6 ± 0.2 <sup>d</sup>  | 2.5 ± 0.3 <sup>d</sup>  | 2.6 ± 0.2 <sup>d</sup>         |
| 14 | 2,6,10-trimethyl-tetradecane        | 77             | Hydrocarbon | 11.25                | -                                                            | -                                                           | 6.5 ± 0.7 <sup>a</sup>      | 0.0 ± 0.0 <sup>e</sup>   | 0.0 ± 0.0 <sup>e</sup>  | 5.9 ± 1.1 <sup>a</sup>  | 1.7 ± 0.2 <sup>d</sup>     | 4.6 ± 0.1 <sup>b</sup>  | 3.8 ± 0.2 <sup>b</sup>  | 2.9 ± 0.2 <sup>c</sup>         |
| 15 | heptadecane                         | 75             | Hydrocarbon | 11.70                | Floral                                                       | -                                                           | 2.4 ± 0.2 <sup>b</sup>      | 4.5 ± 0.9 <sup>a</sup>   | 1.3 ± 0.3 <sup>c</sup>  | 1.1 ± 0.2 <sup>c</sup>  | 1.0 ± 0.1 <sup>c</sup>     | 3.0 ± 0.6 <sup>b</sup>  | 1.3 ± 0.4 <sup>c</sup>  | 1.0 ± 0.0 <sup>c</sup>         |
| 16 | pentadecane                         | 76             | Hydrocarbon | 12.36                | Mild odor                                                    | >13000000 <sup>**</sup>                                     | 3.7 ± 1.1 <sup>a</sup>      | 1.5 ± 0.1 <sup>c</sup>   | 2.9 ± 0.1 <sup>ab</sup> | 1.0 ± 0.3 <sup>c</sup>  | 1.5 ± 0.2 <sup>c</sup>     | 2.5 ± 0.2 <sup>b</sup>  | 3.4 ± 0.5 <sup>a</sup>  | 3.4 ± 0.1 <sup>a</sup>         |
| 17 | 4-methyldecane                      | 67             | Hydrocarbon | 12.87                | Pungent                                                      | -                                                           | 0.0 ± 0.0 <sup>c</sup>      | 3.5 ± 0.6 <sup>a</sup>   | 1.7 ± 0.1 <sup>b</sup>  | 3.2 ± 0.3 <sup>a</sup>  | 3.4 ± 0.1 <sup>a</sup>     | 1.5 ± 0.2 <sup>b</sup>  | 1.4 ± 0.2 <sup>b</sup>  | 0.0 ± 0.0 <sup>c</sup>         |
| 18 | cyclopentadecanone                  | 68             | Ketone      | 13.01                | Musk fragrance                                               | -                                                           | 2.8 ± 0.1 <sup>c</sup>      | 5.6 ± 0.3 <sup>a</sup>   | 2.5 ± 0.3 <sup>c</sup>  | 3.7 ± 0.3 <sup>b</sup>  | 5.6 ± 0.8 <sup>a</sup>     | 2.3 ± 0.2 <sup>cd</sup> | 1.8 ± 0.1 <sup>de</sup> | 1.4 ± 0.0 <sup>e</sup>         |
| 19 | dodecamethyl-cyclohexasiloxane      | 84             | Other       | 13.43                | -                                                            | -                                                           | 2.0 ± 0.0 <sup>b</sup>      | 1.8 ± 0.1 <sup>bc</sup>  | 1.3 ± 0.1 <sup>d</sup>  | 2.0 ± 0.2 <sup>b</sup>  | 2.5 ± 0.3 <sup>a</sup>     | 1.4 ± 0.1 <sup>d</sup>  | 1.6 ± 0.2 <sup>cd</sup> | 0.7 ± 0.1 <sup>e</sup>         |
| 20 | 1-octanol                           | 62             | Alcohol     | 14.67                | Fatty, metallic, citrus, fruity, floral                      | 22                                                          | 1.2 ± 0.2 <sup>c</sup>      | 0.0 ± 0.0 <sup>e</sup>   | 1.7 ± 0.3 <sup>b</sup>  | 2.0 ± 0.2 <sup>a</sup>  | 0.0 ± 0.0 <sup>c</sup>     | 0.9 ± 0.0 <sup>cd</sup> | 1.0 ± 0.0 <sup>c</sup>  | 0.7 ± 0.1 <sup>d</sup>         |
| 21 | 2-tridecanone                       | 61             | Ketone      | 14.89                | Oily, nutty                                                  | -                                                           | 1.3 ± 0.1 <sup>cd</sup>     | 1.6 ± 0.2 <sup>c</sup>   | 2.2 ± 0.1 <sup>b</sup>  | 2.6 ± 0.4 <sup>a</sup>  | 2.5 ± 0.1 <sup>ab</sup>    | 1.2 ± 0.0 <sup>d</sup>  | 1.3 ± 0.1 <sup>cd</sup> | 1.1 ± 0.0 <sup>d</sup>         |
| 22 | nonanal                             | 81             | Aldehyde    | 14.98                | Citrus, cucumber, floral, fresh, grass, soapy, fatty, fruity | 3.1                                                         | 2.5 ± 0.3 <sup>a</sup>      | 2.4 ± 0.2 <sup>a</sup>   | 2.7 ± 0.0 <sup>a</sup>  | 1.0 ± 0.2 <sup>b</sup>  | 0.9 ± 0.1 <sup>b</sup>     | 2.7 ± 0.0 <sup>a</sup>  | 2.7 ± 0.1 <sup>a</sup>  | 2.6 ± 0.2 <sup>a</sup>         |
| 23 | tetradecane                         | 72             | Hydrocarbon | 15.32                | Gasoline-like, alkane                                        | 5000                                                        | 5.2 ± 0.1 <sup>ab</sup>     | 7.7 ± 1.4 <sup>a</sup>   | 4.9 ± 0.9 <sup>ab</sup> | 0.0 ± 0.0 <sup>d</sup>  | 0.0 ± 0.0 <sup>d</sup>     | 3.5 ± 0.4 <sup>c</sup>  | 3.2 ± 0.2 <sup>c</sup>  | 2.7 ± 0.2 <sup>c</sup>         |
| 24 | heptacosane                         | 78             | Hydrocarbon | 15.56                | -                                                            | -                                                           | 2.3 ± 0.0 <sup>b</sup>      | 1.9 ± 0.1 <sup>c</sup>   | 2.6 ± 0.1 <sup>a</sup>  | 2.8 ± 0.1 <sup>a</sup>  | 2.7 ± 0.2 <sup>a</sup>     | 2.4 ± 0.2 <sup>b</sup>  | 2.2 ± 0.1 <sup>b</sup>  | 2.2 ± 0.1 <sup>b</sup>         |
| 25 | benzene, 1,3-bis(1,1-dimethylethyl) | 96             | Hydrocarbon | 15.96                | Beany, bad                                                   | -                                                           | 1.1 ± 0.0 <sup>d</sup>      | 2.7 ± 0.4 <sup>a</sup>   | 1.7 ± 0.5 <sup>c</sup>  | 1.9 ± 0.0 <sup>bc</sup> | 1.9 ± 0.1 <sup>bc</sup>    | 1.1 ± 0.1 <sup>d</sup>  | 1.0 ± 0.1 <sup>d</sup>  | 2.1 ± 0.0 <sup>b</sup>         |
| 26 | 6-methyl-octadecane                 | 75             | Hydrocarbon | 16.33                | -                                                            | 10 <sup>*</sup>                                             | 1.4 ± 0.0 <sup>a</sup>      | 0.0 ± 0.0 <sup>e</sup>   | 1.1 ± 0.2 <sup>c</sup>  | 1.1 ± 0.1 <sup>c</sup>  | 0.9 ± 0.0 <sup>d</sup>     | 1.3 ± 0.0 <sup>ab</sup> | 1.2 ± 0.1 <sup>b</sup>  | 1.2 ± 0.1 <sup>b</sup>         |
| 27 | 1-octen-3-ol                        | 70             | Alcohol     | 17.64                | Raw mushroom, straw                                          | 2.7                                                         | 0.0 ± 0.0 <sup>d</sup>      | 1.4 ± 0.1 <sup>c</sup>   | 0.0 ± 0.0 <sup>d</sup>  | 1.8 ± 0.2 <sup>b</sup>  | 1.6 ± 0.0 <sup>c</sup>     | 1.8 ± 0.1 <sup>b</sup>  | 1.5 ± 0.2 <sup>c</sup>  | 2.3 ± 0.1 <sup>a</sup>         |
| 28 | 2-hexyl-1-octanol                   | 72             | Alcohol     | 17.74                | Waxy                                                         | -                                                           | 15.2 ± 0.1 <sup>a</sup>     | 15.0 ± 0.2 <sup>a</sup>  | 15.5 ± 2.1 <sup>a</sup> | 15.5 ± 0.3 <sup>a</sup> | 13.3 ± 1.6 <sup>b</sup>    | 11.5 ± 0.0 <sup>c</sup> | 11.6 ± 0.2 <sup>c</sup> | 11.5 ± 0.8 <sup>c</sup>        |
| 29 | 1-eicosanol                         | 63             | Alcohol     | 18.85                | -                                                            | -                                                           | 1.3 ± 0.0 <sup>b</sup>      | 1.6 ± 0.0 <sup>a</sup>   | 1.2 ± 0.1 <sup>bc</sup> | 1.5 ± 0.0 <sup>a</sup>  | 1.3 ± 0.1 <sup>bc</sup>    | 1.2 ± 0.2 <sup>bc</sup> | 0.9 ± 0.1 <sup>d</sup>  | 1.1 ± 0.1 <sup>cd</sup>        |
| 30 | 2-decen-1-ol                        | 65             | Alcohol     | 19.02                | Waxy, fresh                                                  | -                                                           | 4.4 ± 0.3 <sup>bc</sup>     | 4.6 ± 0.5 <sup>bc</sup>  | 4.3 ± 0.2 <sup>c</sup>  | 5.0 ± 0.5 <sup>ab</sup> | 2.2 ± 0.4 <sup>e</sup>     | 5.3 ± 0.3 <sup>a</sup>  | 3.7 ± 0.3 <sup>d</sup>  | 3.1 ± 0.1 <sup>d</sup>         |
| 31 | 2-decenal                           | 69             | Aldehyde    | 19.52                | Fatty, waxy, green                                           | 2.7                                                         | 3.9 ± 0.1 <sup>b</sup>      | 5.9 ± 0.1 <sup>a</sup>   | 3.5 ± 0.2 <sup>c</sup>  | 4.1 ± 0.1 <sup>b</sup>  | 2.2 ± 0.1 <sup>e</sup>     | 3.1 ± 0.1 <sup>d</sup>  | 2.4 ± 0.0 <sup>e</sup>  | 2.9 ± 0.2 <sup>d</sup>         |

|    |                                                 |    |             |       |                                                                   |                      |                          |                          |                          |                          |                          |                          |                          |                         |  |
|----|-------------------------------------------------|----|-------------|-------|-------------------------------------------------------------------|----------------------|--------------------------|--------------------------|--------------------------|--------------------------|--------------------------|--------------------------|--------------------------|-------------------------|--|
|    |                                                 |    |             |       | herbal geranium                                                   |                      |                          |                          |                          |                          |                          |                          |                          |                         |  |
| 32 | 2-methyl-1-hexadecanol                          | 73 | Alcohol     | 19.91 | Medical, mushroom, rotten                                         | -                    | 1.2 ± 0.0 <sup>c</sup>   | 1.4 ± 0.2 <sup>c</sup>   | 1.7 ± 0.0 <sup>b</sup>   | 1.9 ± 0.1 <sup>a</sup>   | 1.2 ± 0.2 <sup>c</sup>   | 0.0 ± 0.0 <sup>e</sup>   | 0.0 ± 0.0 <sup>e</sup>   | 0.7 ± 0.2 <sup>d</sup>  |  |
| 33 | benzaldehyde                                    | 76 | Aldehyde    | 20.34 | Nutty, sweet, bitter, almond                                      | 85                   | 1.3 ± 0.0 <sup>cd</sup>  | 0.0 ± 0.0 <sup>e</sup>   | 1.6 ± 0.1 <sup>cd</sup>  | 38.9 ± 1.6 <sup>a</sup>  | 35.1 ± 0.0 <sup>b</sup>  | 1.4 ± 0.2 <sup>cd</sup>  | 0.9 ± 0.1 <sup>de</sup>  | 2.2 ± 0.1 <sup>c</sup>  |  |
| 34 | 8,8,9-trimethyl-deca-3,5-diene-2,7-dione        | 61 | Ketone      | 20.45 | -                                                                 | -                    | 32.5 ± 0.9 <sup>b</sup>  | 37.6 ± 3.0 <sup>a</sup>  | 38.7 ± 4.5 <sup>a</sup>  | 0.0 ± 0.0 <sup>d</sup>   | 0.0 ± 0.0 <sup>d</sup>   | 31.6 ± 2.7 <sup>b</sup>  | 25.0 ± 1.2 <sup>c</sup>  | 29.6 ± 0.2 <sup>b</sup> |  |
| 35 | 2-nonenal                                       | 71 | Aldehyde    | 21.18 | Fatty, woody                                                      | 0.039                | 1.6 ± 0.3 <sup>b</sup>   | 2.4 ± 0.5 <sup>a</sup>   | 2.5 ± 0.7 <sup>a</sup>   | 0.9 ± 0.2 <sup>c</sup>   | 2.0 ± 0.2 <sup>ab</sup>  | 1.0 ± 0.1 <sup>c</sup>   | 0.0 ± 0.0 <sup>d</sup>   | 0.8 ± 0.0 <sup>e</sup>  |  |
| 36 | 2-myristynoyl pantetheine                       | 63 | Other       | 22.43 | -                                                                 | -                    | 1.8 ± 0.1 <sup>ab</sup>  | 1.7 ± 0.0 <sup>b</sup>   | 1.9 ± 0.1 <sup>ab</sup>  | 2.1 ± 0.0 <sup>a</sup>   | 2.1 ± 0.2 <sup>a</sup>   | 2.0 ± 0.2 <sup>a</sup>   | 1.8 ± 0.1 <sup>ab</sup>  | 1.7 ± 0.2 <sup>b</sup>  |  |
| 37 | nonadecane                                      | 79 | Hydrocarbon | 23.47 | Sweet, rosy                                                       | -                    | 1.9 ± 0.3 <sup>a</sup>   | 1.7 ± 0.3 <sup>a</sup>   | 0.0 ± 0.0 <sup>d</sup>   | 0.0 ± 0.0 <sup>d</sup>   | 1.4 ± 0.0 <sup>b</sup>   | 0.9 ± 0.1 <sup>c</sup>   | 1.6 ± 0.1 <sup>ab</sup>  | 1.0 ± 0.1 <sup>c</sup>  |  |
| 38 | 10-methyl-e-11-tridecen-1-ol propionate         | 69 | Hydrocarbon | 23.88 | -                                                                 | -                    | 5.7 ± 0.3 <sup>b</sup>   | 5.4 ± 0.3 <sup>b</sup>   | 6.3 ± 0.8 <sup>ab</sup>  | 7.2 ± 0.9 <sup>a</sup>   | 5.2 ± 0.0 <sup>b</sup>   | 2.2 ± 1.3 <sup>c</sup>   | 2.6 ± 0.5 <sup>c</sup>   | 0.6 ± 0.1 <sup>d</sup>  |  |
| 39 | 2-nonen-1-ol                                    | 73 | Alcohol     | 24.75 | Green type                                                        | 209                  | 10.8 ± 0.9 <sup>cd</sup> | 12.6 ± 0.9 <sup>bc</sup> | 9.7 ± 0.2 <sup>d</sup>   | 13.3 ± 0.7 <sup>ab</sup> | 15.0 ± 2.6 <sup>a</sup>  | 9.3 ± 0.9 <sup>d</sup>   | 9.1 ± 0.3 <sup>d</sup>   | 9.4 ± 0.3 <sup>d</sup>  |  |
| 40 | oleic acid                                      | 73 | Acid        | 25.66 | -                                                                 | -                    | 1.5 ± 0.4 <sup>b</sup>   | 0.0 ± 0.0 <sup>c</sup>   | 0.0 ± 0.0 <sup>c</sup>   | 1.4 ± 0.0 <sup>b</sup>   | 1.3 ± 0.3 <sup>b</sup>   | 2.4 ± 0.5 <sup>a</sup>   | 1.7 ± 0.1 <sup>b</sup>   | 1.7 ± 0.2 <sup>b</sup>  |  |
| 41 | dimethyl silanediol                             | 70 | Alcohol     | 25.94 | -                                                                 | -                    | 3.3 ± 0.7 <sup>b</sup>   | 2.9 ± 0.6 <sup>bc</sup>  | 2.5 ± 0.2 <sup>cd</sup>  | 5.4 ± 0.2 <sup>a</sup>   | 1.9 ± 0.1 <sup>de</sup>  | 1.9 ± 0.0 <sup>de</sup>  | 1.3 ± 0.3 <sup>e</sup>   | 1.7 ± 0.1 <sup>e</sup>  |  |
| 42 | 2-butyl-2-octenal                               | 87 | Aldehyde    | 26.22 | Sour, fruity, pineapple, lemon                                    | 20 <sup>*</sup>      | 0.0 ± 0.0 <sup>d</sup>   | 1.8 ± 0.1 <sup>a</sup>   | 1.6 ± 0.2 <sup>a</sup>   | 0.0 ± 0.0 <sup>d</sup>   | 1.1 ± 0.1 <sup>b</sup>   | 1.6 ± 0.2 <sup>a</sup>   | 1.6 ± 0.1 <sup>a</sup>   | 0.8 ± 0.1 <sup>c</sup>  |  |
| 43 | cyclooctasiloxane, hexadecamethyl               | 89 | Other       | 27.37 | -                                                                 | -                    | 1.0 ± 0.1 <sup>c</sup>   | 1.5 ± 0.4 <sup>b</sup>   | 1.5 ± 0.2 <sup>b</sup>   | 1.2 ± 0.1 <sup>bc</sup>  | 1.9 ± 0.1 <sup>a</sup>   | 1.4 ± 0.1 <sup>b</sup>   | 0.0 ± 0.0 <sup>d</sup>   | 0.0 ± 0.0 <sup>d</sup>  |  |
| 44 | geranyl isovalerate                             | 79 | Ester       | 27.52 | Rose odor with an apple-pineapple undertone and sweet apple taste | -                    | 2.0 ± 0.1 <sup>cd</sup>  | 2.8 ± 0.2 <sup>a</sup>   | 2.5 ± 0.4 <sup>ab</sup>  | 2.2 ± 0.2 <sup>bc</sup>  | 2.0 ± 0.1 <sup>cd</sup>  | 2.9 ± 0.1 <sup>a</sup>   | 1.5 ± 0.2 <sup>e</sup>   | 1.6 ± 0.1 <sup>de</sup> |  |
| 45 | naphthalene                                     | 60 | Other       | 27.81 | Naphthalene                                                       | 450                  | 0.0 ± 0.0 <sup>d</sup>   | 1.7 ± 0.1 <sup>b</sup>   | 0.0 ± 0.0 <sup>d</sup>   | 1.9 ± 0.2 <sup>a</sup>   | 1.3 ± 0.1 <sup>c</sup>   | 0.0 ± 0.0 <sup>d</sup>   | 1.7 ± 0.1 <sup>ab</sup>  | 0.0 ± 0.0 <sup>d</sup>  |  |
| 46 | z-8-methyl-9-tetradecenoic acid                 | 66 | Acid        | 28.93 | -                                                                 | -                    | 3.0 ± 0.0 <sup>b</sup>   | 2.3 ± 0.0 <sup>d</sup>   | 2.7 ± 0.3 <sup>bc</sup>  | 2.3 ± 0.2 <sup>d</sup>   | 2.0 ± 0.1 <sup>e</sup>   | 2.5 ± 0.1 <sup>cd</sup>  | 2.3 ± 0.1 <sup>d</sup>   | 3.4 ± 0.1 <sup>a</sup>  |  |
| 47 | methoxy-phenyl-oxime                            | 62 | Other       | 30.54 | -                                                                 | -                    | 0.0 ± 0.0 <sup>e</sup>   | 4.0 ± 0.2 <sup>a</sup>   | 1.9 ± 0.1 <sup>c</sup>   | 1.7 ± 0.3 <sup>c</sup>   | 2.2 ± 0.0 <sup>b</sup>   | 1.7 ± 0.2 <sup>c</sup>   | 0.0 ± 0.0 <sup>e</sup>   | 0.7 ± 0.1 <sup>d</sup>  |  |
| 48 | 1,2-15,16-diepoxyhexadecane                     | 73 | Other       | 31.20 | -                                                                 | -                    | 3.2 ± 0.5 <sup>bc</sup>  | 3.9 ± 0.3 <sup>a</sup>   | 3.1 ± 0.3 <sup>bc</sup>  | 3.3 ± 0.3 <sup>b</sup>   | 3.5 ± 0.5 <sup>ab</sup>  | 2.7 ± 0.1 <sup>cd</sup>  | 2.5 ± 0.0 <sup>d</sup>   | 3.5 ± 0.0 <sup>ab</sup> |  |
| 49 | 10-heptadecen-8-ynoic acid, methyl ester, (e)-  | 70 | Ester       | 32.06 | -                                                                 | -                    | 7.7 ± 1.2 <sup>de</sup>  | 8.6 ± 0.1 <sup>cde</sup> | 12.8 ± 1.6 <sup>b</sup>  | 15.7 ± 2.7 <sup>a</sup>  | 10.8 ± 0.6 <sup>bc</sup> | 9.4 ± 0.2 <sup>cd</sup>  | 6.6 ± 0.0 <sup>e</sup>   | 6.9 ± 1.0 <sup>e</sup>  |  |
| 50 | cis-7-hexadecenoic acid                         | 70 | Acid        | 32.82 | -                                                                 | -                    | 1.4 ± 0.0 <sup>b</sup>   | 1.9 ± 0.2 <sup>a</sup>   | 1.4 ± 0.2 <sup>b</sup>   | 0.0 ± 0.0 <sup>d</sup>   | 1.5 ± 0.0 <sup>b</sup>   | 0.0 ± 0.0 <sup>d</sup>   | 1.1 ± 0.1 <sup>c</sup>   | 1.0 ± 0.2 <sup>c</sup>  |  |
| 51 | 2-hexadecanol                                   | 69 | Alcohol     | 33.50 | Floral, herbal, green                                             | -                    | 1.5 ± 0.3 <sup>cd</sup>  | 2.4 ± 0.5 <sup>a</sup>   | 1.7 ± 0.2 <sup>bcd</sup> | 2.0 ± 0.6 <sup>abc</sup> | 0.0 ± 0.0 <sup>e</sup>   | 0.0 ± 0.0 <sup>e</sup>   | 1.4 ± 0.1 <sup>d</sup>   | 2.1 ± 0.3 <sup>ab</sup> |  |
| 52 | cholestan-3-ol, 2-methylene-, (3β,5α)-          | 70 | Alcohol     | 36.57 | -                                                                 | -                    | 1.2 ± 0.1 <sup>e</sup>   | 1.7 ± 0.1 <sup>b</sup>   | 1.6 ± 0.2 <sup>bc</sup>  | 2.0 ± 0.0 <sup>a</sup>   | 1.3 ± 0.1 <sup>de</sup>  | 1.4 ± 0.0 <sup>cd</sup>  | 1.6 ± 0.2 <sup>bc</sup>  | 1.6 ± 0.1 <sup>bc</sup> |  |
| 53 | 2h-pyran, tetrahydro-2-(12-pentadecynyloxy)-    | 72 | Other       | 37.41 | -                                                                 | -                    | 1.7 ± 0.2 <sup>a</sup>   | 1.5 ± 0.1 <sup>ab</sup>  | 0.0 ± 0.0 <sup>f</sup>   | 1.1 ± 0.2 <sup>cde</sup> | 1.3 ± 0.0 <sup>bc</sup>  | 1.2 ± 0.1 <sup>cd</sup>  | 1.0 ± 0.0 <sup>e</sup>   | 1.0 ± 0.1 <sup>de</sup> |  |
| 54 | 2-methyl-e,e-3,13-octadecadien-1-ol             | 70 | Alcohol     | 37.58 | -                                                                 | -                    | 1.7 ± 0.4 <sup>ab</sup>  | 2.0 ± 0.2 <sup>a</sup>   | 1.7 ± 0.2 <sup>ab</sup>  | 1.6 ± 0.2 <sup>b</sup>   | 1.1 ± 0.1 <sup>c</sup>   | 0.0 ± 0.0 <sup>d</sup>   | 0.8 ± 0.0 <sup>c</sup>   | 0.9 ± 0.1 <sup>c</sup>  |  |
| 55 | 2,4-di-tert-butylphenol                         | 91 | Phenol      | 44.11 | Oxidized, lavender, unpleasant                                    | 330000 <sup>**</sup> | 1.8 ± 0.2 <sup>a</sup>   | 1.6 ± 0.1 <sup>ab</sup>  | 1.3 ± 0.3 <sup>bc</sup>  | 1.5 ± 0.4 <sup>ab</sup>  | 1.3 ± 0.1 <sup>bc</sup>  | 1.0 ± 0.1 <sup>cd</sup>  | 1.0 ± 0.2 <sup>cd</sup>  | 0.9 ± 0.1 <sup>d</sup>  |  |
| 56 | hexadecanoic acid, methyl ester                 | 73 | Ester       | 50.43 | Toasted                                                           | -                    | 20.5 ± 3.2 <sup>a</sup>  | 15.4 ± 1.1 <sup>b</sup>  | 20.6 ± 1.4 <sup>a</sup>  | 13.4 ± 2.4 <sup>bc</sup> | 12.9 ± 0.7 <sup>bc</sup> | 14.0 ± 0.7 <sup>bc</sup> | 13.4 ± 0.8 <sup>bc</sup> | 11.9 ± 0.3 <sup>c</sup> |  |
| 57 | 9,11-octadecadienoic acid, methyl ester, (e,e)- | 84 | Ester       | 53.09 | -                                                                 | -                    | 3.1 ± 0.0 <sup>d</sup>   | 3.7 ± 0.2 <sup>b</sup>   | 3.3 ± 0.1 <sup>cd</sup>  | 3.6 ± 0.2 <sup>bc</sup>  | 3.8 ± 0.2 <sup>b</sup>   | 5.8 ± 0.1 <sup>a</sup>   | 3.0 ± 0.4 <sup>d</sup>   | 2.5 ± 0.1 <sup>e</sup>  |  |
| 58 | (e)-2-dodecenal                                 | 73 | Hydrocarbon | 54.53 | Fatty, green                                                      | -                    | 8.1 ± 0.1 <sup>c</sup>   | 8.1 ± 0.1 <sup>c</sup>   | 7.0 ± 0.4 <sup>cde</sup> | 10.1 ± 0.9 <sup>b</sup>  | 11.7 ± 1.5 <sup>a</sup>  | 6.5 ± 0.0 <sup>de</sup>  | 7.3 ± 0.4 <sup>cd</sup>  | 5.9 ± 0.1 <sup>e</sup>  |  |
| 59 | tert-hexadecanethiol                            | 74 | Alcohol     | 55.30 | Almond shell                                                      | -                    | 3.0 ± 0.0 <sup>abc</sup> | 3.9 ± 0.2 <sup>a</sup>   | 3.4 ± 0.3 <sup>abc</sup> | 2.9 ± 1.3 <sup>bc</sup>  | 3.8 ± 0.3 <sup>ab</sup>  | 3.0 ± 0.2 <sup>abc</sup> | 2.8 ± 0.2 <sup>c</sup>   | 2.7 ± 0.2 <sup>c</sup>  |  |
| 60 | hexadecane                                      | 75 | Hydrocarbon | 57.42 | Green tea-like, meaty                                             | 500                  | 0.8 ± 0.2 <sup>b</sup>   | 0.0 ± 0.0 <sup>c</sup>   | 0.7 ± 0.1 <sup>b</sup>   | 1.0 ± 0.1 <sup>a</sup>   | 0.8 ± 0.1 <sup>b</sup>   | 0.0 ± 0.0 <sup>c</sup>   | 0.7 ± 0.1 <sup>b</sup>   | 0.6 ± 0.1 <sup>b</sup>  |  |
| 61 | 6,10-dimethyl-5,9-undecadien-2-one              | 65 | Ketone      | 61.05 | Green, fruit, rose                                                | -                    | 1.9 ± 0.0 <sup>b</sup>   | 1.7 ± 0.3 <sup>bc</sup>  | 1.6 ± 0.1 <sup>bc</sup>  | 1.8 ± 0.3 <sup>bc</sup>  | 2.2 ± 0.3 <sup>a</sup>   | 1.7 ± 0.1 <sup>bc</sup>  | 1.2 ± 0.1 <sup>d</sup>   | 1.5 ± 0.0 <sup>bc</sup> |  |
| 62 | estra-1,3,5(10)-trien-17β-ol                    | 78 | Other       | 62.76 | -                                                                 | -                    | 1.2 ± 0.0 <sup>a</sup>   | 1.0 ± 0.1 <sup>b</sup>   | 0.6 ± 0.1 <sup>d</sup>   | 0.0 ± 0.0 <sup>e</sup>   | 1.1 ± 0.0 <sup>ab</sup>  | 0.0 ± 0.0 <sup>e</sup>   | 0.8 ± 0.0 <sup>c</sup>   | 0.6 ± 0.1 <sup>d</sup>  |  |

<sup>1</sup> Sample means with different lowercase letters in the same row are significantly different (p < 0.05).

<sup>2</sup> The relative contents of volatiles components were semi-quantified by peak areas in the total ion chromatogram using 2-Methyl-3-heptanone as an internal standard

solution.

<sup>3-18</sup> Hu, Lu, Guo, Zhu, (2020); van Gemert, (2011); Zhao, Xue, Shen. (2020); Song, Zhang, Zhang, Wang, Chen, Dai, Shen, (2019); Jia, Zhou, Wang, Liu, Huang, Huang, (2019); Migita, Iiduka, Tsukamoto, Sugiura, Tanaka, Sakamaki, Yamamoto, Takeshige, Miyazawa, Kojima, (2017); Attar, Hinge, Zanan, Adhav, Nadaf, (2017); Feng, Yang, Ma, Zhao, Zhuang, Zhang, Chen, (2021); Parmar, Patel, Sheth, (2018); Wijit, Prasitwattanaseree, Mahatheeranont, Wolschann, Jiranusornkul, Nimmanpipug, (2017); Beldarrain, Morán, Sentandreu, Barron, Aldai, (2022); Dias, dos Santos, Martínez, (2018); Bu, Zhou, Zheng, Yang, Song, Li, Wu, (2020); Oliveira, Monsalve, Nerin, Padula, Godoy, (2020); Nishimura, (1995). Odor threshold values were obtained in air; \*: odor threshold value were obtained in water, ng·g<sup>-1</sup>; \*\*: odor threshold values were obtained in mineral oil,

ng·g<sup>-1</sup>.

Table S2. Pearson correlations between chemical compositions, molecular structural parameters and broken grains (n=8)<sup>1</sup>.

|                           |                                 | Broken grain (%) |
|---------------------------|---------------------------------|------------------|
| Chemical compositions     | Total starch content (%)        | 0.151            |
|                           | Total crude protein content (%) | 0.107            |
|                           | Amylose content (%)             | 0.212            |
| Ap CLD fitting parameters | $\beta_{Ap,i}$                  | -0.407           |
|                           | $\beta_{Ap,ii}$                 | -0.05            |
|                           | $\beta_{Ap,iii}$                | -0.38            |
|                           | $\beta_{Ap,iv}$                 | -0.259           |
|                           | $\beta_{Ap,v}$                  | -.788*           |
|                           | $\beta_{Ap,vi}$                 | 0.461            |
|                           | $h_{Ap,i}$                      | 0.3              |
|                           | $h_{Ap,iii}$                    | 0.382            |
|                           | $h_{Ap,v}$                      | 0.619            |
|                           | $\beta_{Am,1}$                  | 0.463            |
| Am CLD fitting parameters | $\beta_{Am,2}$                  | -0.467           |
|                           | $\beta_{Am,3}$                  | -0.551           |
|                           | $h_{Am,1}$                      | -0.018           |
|                           | $h_{Am,2}$                      | 0.349            |
|                           | $h_{Am,3}$                      | 0.223            |
|                           | $\bar{R}_h$                     | -0.633           |
| Branched SEC              | $\bar{R}_{h, Am}$               | -0.515           |
|                           | $\bar{R}_{h, Ap}$               | -0.647           |

<sup>1</sup> \* Correlation is significant at the 0.05 level (two-tailed).

Table S3. Pearson correlations between rice sensory measured by panellists and relative contents of volatile compounds (n=8)<sup>1</sup>.

|                                     | Aroma intensity | Sulfurous | Eggy    | Green vegetable | Root vegetables | Sweet caramelised | Brown bread | Earthy | Cereal / Porridge | Fragrant rice | Resinous | Plastic | Raw cookie dough | Card-board | Chemical |
|-------------------------------------|-----------------|-----------|---------|-----------------|-----------------|-------------------|-------------|--------|-------------------|---------------|----------|---------|------------------|------------|----------|
| cyclotetrasiloxane, octamethyl      | -0.381          | -0.205    | -0.495  | 0.181           | -0.101          | -0.579            | -0.07       | 0.29   | 0.183             | -0.103        | -0.221   | 0.462   | -0.066           | 0.191      | -0.043   |
| undecane                            | -0.448          | -0.053    | 0.136   | 0.421           | -0.061          | -0.347            | 0.216       | 0.136  | 0.28              | -0.372        | -0.156   | -0.208  | 0.045            | -0.102     | -0.415   |
| furfural                            | -0.518          | -0.357    | -0.63   | 0.308           | 0.145           | -0.515            | -0.239      | 0.354  | 0.266             | -0.268        | -0.367   | 0.46    | -0.214           | 0.249      | -0.032   |
| hexanal                             | -0.657          | -0.401    | 0.19    | 0.003           | -0.263          | -0.114            | -0.174      | -0.382 | 0.68              | -0.029        | -0.415   | -0.27   | -0.24            | 0.039      | -0.253   |
| 3,7,11-trimethyl-1-dodecanol        | -0.448          | -0.151    | 0.473   | -0.091          | -0.346          | -0.275            | -0.249      | -0.481 | 0.587             | 0.147         | -0.248   | -0.185  | -0.25            | 0.085      | -0.233   |
| 2-heptenal                          | 0.1             | -0.009    | -0.294  | 0.503           | 0.467           | -0.513            | 0.105       | 0.377  | -0.213            | -0.217        | .725*    | 0.562   | -0.499           | 0.111      | 0.219    |
| dodecanal                           | -0.382          | -0.346    | -0.672  | -0.142          | -0.002          | -0.082            | -0.237      | 0.163  | 0.235             | -0.037        | -0.529   | 0.314   | -0.011           | 0.35       | 0.054    |
| dihydro-5-pentyl-2(3h)-furanone     | -0.531          | -.802*    | -.842** | 0.005           | 0.035           | -0.184            | -0.249      | -0.026 | 0.421             | 0.067         | -0.068   | 0.535   | -0.603           | 0.229      | 0.367    |
| dodecane                            | -0.191          | -0.372    | -0.165  | 0.054           | -0.229          | -0.372            | 0.08        | -0.194 | 0.231             | 0.23          | 0.478    | 0.363   | -0.497           | -0.038     | 0.253    |
| 5-tridecene, (z)-                   | 0.586           | 0.659     | 0.056   | 0.52            | 0.341           | -0.069            | 0.243       | .763*  | -.820*            | -0.426        | 0.039    | -0.034  | 0.665            | -0.429     | -0.166   |
| 2-methoxy-phenol                    | -0.149          | 0.07      | 0.12    | -0.349          | -0.1            | -0.249            | -0.465      | -0.248 | 0.296             | 0.241         | -0.313   | 0.208   | -0.156           | 0.511      | -0.039   |
| cis-vaccenic acid                   | 0.634           | 0.459     | 0.419   | 0.319           | 0.347           | 0.416             | 0.214       | 0.24   | -0.641            | -0.232        | 0.3      | -0.399  | 0.341            | -0.555     | -0.018   |
| octadecane, 1-(ethenyl)-            | -0.629          | -0.237    | -0.095  | -0.067          | -0.465          | -0.234            | 0.098       | -0.078 | 0.513             | -0.065        | -0.579   | -0.154  | 0.206            | 0.098      | -0.371   |
| 2,6,10-trimethyl- tetradecane       | 0.441           | 0.27      | -0.452  | 0.172           | 0.22            | 0.064             | 0.214       | 0.618  | -0.645            | -0.175        | 0.062    | 0.241   | 0.45             | -0.172     | 0.127    |
| heptadecane                         | -0.454          | -0.238    | -0.205  | 0.627           | 0.371           | -0.026            | -0.144      | 0.405  | 0.142             | -0.649        | -0.609   | -0.247  | 0.084            | -0.248     | -0.312   |
| pentadecane                         | 0.566           | 0.444     | 0.464   | 0.045           | 0.099           | 0.632             | 0.311       | 0.08   | -0.53             | -0.119        | 0.087    | -0.608  | 0.557            | -0.522     | -0.11    |
| 4-methyldecane                      | -0.489          | -0.568    | -0.357  | -0.161          | -0.219          | -0.445            | -0.532      | -0.296 | 0.544             | 0.311         | -0.191   | 0.53    | -0.601           | 0.294      | 0.262    |
| cyclopentadecanone                  | -0.66           | -0.332    | -0.149  | -0.139          | -0.248          | -0.352            | -0.375      | -0.188 | 0.631             | 0.037         | -0.633   | 0.119   | -0.17            | 0.377      | -0.193   |
| dodecamethyl-cyclohexasiloxane      | -0.113          | -0.118    | -0.234  | -0.222          | -0.283          | -0.231            | -0.521      | -0.022 | 0.106             | 0.257         | -0.594   | 0.323   | 0.101            | 0.057      | 0.108    |
| 1-octanol                           | 0.568           | 0.282     | 0.032   | -0.003          | -0.207          | -0.193            | 0.262       | 0.12   | -0.514            | 0.297         | 0.633    | 0.329   | 0.118            | -0.309     | 0.294    |
| 2-tridecanone                       | -0.141          | -0.058    | 0.048   | -0.419          | -0.533          | -0.597            | -0.245      | -0.38  | 0.334             | 0.564         | 0.112    | 0.516   | -0.301           | 0.381      | 0.149    |
| nonanal                             | 0.261           | 0.144     | 0.32    | 0.438           | 0.347           | 0.454             | 0.192       | 0.177  | -0.339            | -0.383        | 0.085    | -0.543  | 0.212            | -0.594     | -0.114   |
| tetradecane                         | -0.223          | -0.064    | 0.273   | 0.38            | 0.054           | 0.311             | 0.114       | 0.079  | 0.077             | -0.426        | -0.444   | -0.665  | 0.313            | -0.511     | -0.37    |
| heptacosane                         | 0.406           | 0.383     | 0.126   | -0.223          | -0.171          | -0.597            | -0.204      | -0.038 | -0.232            | 0.453         | 0.447    | 0.65    | -0.157           | 0.285      | 0.251    |
| benzene, 1,3-bis(1,1-dimethylethyl) | -.940**         | -0.454    | -0.028  | -0.285          | -0.368          | -0.185            | 0.284       | -0.466 | .976**            | -0.012        | -0.16    | -0.204  | -0.334           | 0.648      | -0.391   |
| 6-methyl-octadecane                 | .827*           | 0.634     | 0.166   | 0.064           | 0.239           | 0.087             | 0.147       | 0.346  | -.796*            | 0.036         | 0.453    | 0.128   | 0.347            | -0.202     | 0.165    |

|                                                         |         |         |        |        |        |        |        |        |        |        |        |        |        |        |        |
|---------------------------------------------------------|---------|---------|--------|--------|--------|--------|--------|--------|--------|--------|--------|--------|--------|--------|--------|
| 1-octen-3-ol                                            | -0.356  | -0.489  | -0.664 | -0.043 | 0.343  | -0.043 | 0.057  | 0.013  | 0.308  | -0.077 | 0.327  | 0.404  | -0.627 | 0.582  | 0.244  |
| 2-hexyl-1-octanol                                       | -0.229  | 0.109   | 0.248  | -0.142 | -0.621 | -0.337 | 0.15   | -0.137 | 0.233  | 0.159  | -0.279 | -0.104 | 0.33   | -0.059 | -0.305 |
| 1-eicosanol                                             | -0.686  | -0.195  | -0.178 | 0.089  | -0.292 | -0.457 | 0.127  | 0.071  | 0.516  | -0.199 | -0.446 | 0.008  | 0.077  | 0.269  | -0.409 |
| 2-decen-1-ol                                            | 0.099   | 0.01    | -0.288 | 0.674  | 0.311  | -0.301 | 0.045  | 0.587  | -0.372 | -0.39  | 0.094  | 0.231  | 0.057  | -0.431 | 0.045  |
| 2-decenal                                               | -0.637  | -0.308  | -0.164 | 0.234  | -0.195 | -0.137 | 0.256  | 0.088  | 0.427  | -0.328 | -0.406 | -0.254 | 0.125  | -0.053 | -0.382 |
| 2-methyl-1-hexadecanol                                  | -0.411  | 0.068   | 0.249  | -0.344 | -0.701 | -0.455 | 0.298  | -0.319 | 0.492  | 0.253  | -0.079 | -0.031 | 0.128  | 0.344  | -0.358 |
| benzaldehyde                                            | -0.155  | -0.095  | -0.32  | -0.41  | -0.307 | -0.514 | -0.164 | -0.148 | 0.249  | 0.416  | 0.096  | 0.642  | -0.272 | 0.59   | 0.187  |
| 8,8,9-trimethyl-deca-3,5-diene-2,7-dione                | 0.05    | 0.16    | 0.433  | 0.461  | 0.234  | 0.326  | 0.212  | 0.143  | -0.153 | -0.453 | -0.104 | -0.652 | 0.279  | -0.528 | -0.324 |
| 2-nonenal                                               | -0.445  | 0.238   | 0.595  | 0.087  | -0.262 | -0.449 | -0.055 | -0.153 | 0.457  | -0.158 | -0.434 | -0.314 | 0.144  | 0.189  | -0.608 |
| 2-myristynoyl pantetheine                               | 0.301   | 0.13    | -0.275 | 0      | 0.034  | -0.622 | -0.509 | 0.206  | -0.277 | 0.301  | 0.136  | .846** | -0.222 | 0.151  | 0.391  |
| nonadecane                                              | -0.181  | -0.19   | -0.151 | -0.003 | 0.118  | 0.649  | -0.117 | 0.088  | 0.046  | -0.287 | -.793* | -0.535 | 0.41   | -0.239 | -0.179 |
| 10-methyl-e-11-tridecen-1-ol propionate                 | -0.116  | 0.037   | 0.1    | -0.182 | -0.573 | -0.432 | -0.14  | -0.135 | 0.154  | 0.314  | -0.263 | 0.191  | 0.167  | -0.052 | -0.061 |
| 2-nonen-1-ol                                            | -0.538  | -0.214  | -0.212 | -0.353 | -0.381 | -0.419 | -0.221 | -0.207 | 0.561  | 0.208  | -0.436 | 0.278  | -0.118 | 0.563  | -0.133 |
| oleic acid                                              | 0.447   | 0.213   | -0.441 | 0.283  | 0.636  | 0.065  | -0.049 | 0.59   | -0.601 | -0.269 | 0.215  | 0.353  | 0.049  | 0.034  | 0.243  |
| dimethyl silanediol                                     | -0.214  | -0.027  | -0.303 | -0.043 | -0.38  | -0.449 | 0.298  | 0.158  | 0.099  | 0.065  | 0.014  | 0.297  | 0.156  | 0.148  | -0.097 |
| 2-butyl-2-octenal                                       | -0.061  | -0.367  | 0.13   | 0.225  | 0.301  | 0.108  | -0.56  | -0.248 | 0.15   | 0.012  | 0.008  | 0      | -0.576 | -0.258 | 0.275  |
| cyclooctasiloxane, hexadecamethyl                       | -0.254  | 0.21    | 0.166  | 0.315  | 0.068  | -.782* | -0.462 | 0.205  | 0.171  | -0.175 | -0.381 | 0.304  | -0.077 | 0.227  | -0.274 |
| geranyl isovalerate                                     | -0.318  | 0.065   | 0.019  | .721*  | 0.384  | -0.68  | -0.257 | 0.435  | 0.089  | -0.523 | -0.204 | 0.191  | -0.175 | 0.008  | -0.289 |
| naphthalene                                             | -0.338  | -.853** | -0.677 | -0.485 | -0.406 | 0.126  | -0.359 | -0.438 | 0.428  | 0.553  | -0.152 | 0.429  | -0.477 | 0.06   | 0.567  |
| z-8-methyl-9-tetradecenoic acid                         | 0.082   | 0.484   | 0.418  | 0.074  | 0.017  | 0.246  | .856** | 0.133  | -0.131 | -0.355 | 0.285  | -0.625 | 0.495  | 0.046  | -0.529 |
| methoxy-phenyl-oxime                                    | -.751*  | -0.386  | -0.078 | 0.184  | -0.003 | -0.511 | -0.244 | -0.132 | 0.687  | -0.173 | -0.274 | 0.129  | -0.475 | 0.374  | -0.227 |
| 1,2-15,16-diepoxylhexadecane                            | -.909** | -0.169  | 0.073  | -0.26  | -0.41  | -0.204 | 0.386  | -0.273 | .867** | -0.164 | -0.442 | -0.365 | 0.077  | 0.66   | -0.661 |
| 10-heptadecen-8-ynoic acid, methyl ester, (e)-          | -0.019  | 0.082   | -0.019 | -0.076 | -0.291 | -.782* | -0.096 | -0.062 | 0.098  | 0.333  | 0.362  | 0.637  | -0.301 | 0.291  | 0.132  |
| cis-7-hexadecenoic acid                                 | -0.393  | -0.125  | 0.491  | -0.394 | -0.487 | 0.423  | 0.006  | -0.557 | 0.529  | 0.118  | -0.62  | -.737* | 0.269  | -0.053 | -0.382 |
| 2-hexadecanol                                           | -0.414  | -0.364  | -0.032 | -0.345 | -0.604 | 0.329  | 0.698  | -0.398 | 0.444  | 0.146  | 0.095  | -0.445 | 0.13   | -0.041 | -0.174 |
| cholestan-3-ol, 2-methylene-, (3 $\beta$ ,5 $\alpha$ )- | -0.297  | -0.617  | -0.441 | -0.253 | -0.345 | -0.203 | 0.142  | -0.365 | 0.389  | 0.418  | 0.529  | 0.456  | -0.624 | 0.175  | 0.413  |
| 2h-pyran, tetrahydro-2-(12-                             | -0.363  | -0.156  | -0.543 | 0.191  | 0.247  | 0.164  | -0.004 | 0.463  | 0.056  | -0.489 | -.736* | -0.127 | 0.364  | 0.103  | -0.262 |

|                                                 |        |        |        |        |        |        |        |        |        |        |        |        |        |        |        |
|-------------------------------------------------|--------|--------|--------|--------|--------|--------|--------|--------|--------|--------|--------|--------|--------|--------|--------|
| pentadecynyloxy)-                               |        |        |        |        |        |        |        |        |        |        |        |        |        |        |        |
| 2-methyl-e,e-3,13-                              | -0.403 | -0.109 | 0.268  | -0.439 | -.831* | 0.041  | 0.322  | -0.448 | 0.485  | 0.276  | -0.355 | -0.409 | 0.349  | -0.022 | -0.337 |
| octadecadien-1-ol                               |        |        |        |        |        |        |        |        |        |        |        |        |        |        |        |
| 2,4-di-tert-butylphenol                         | -0.218 | 0.107  | 0.069  | -0.044 | -0.463 | -0.086 | 0.099  | 0.098  | 0.094  | -0.058 | -0.657 | -0.26  | 0.612  | -0.194 | -0.375 |
| hexadecanoic acid, methyl ester                 | 0.294  | 0.542  | 0.67   | 0.182  | -0.259 | -0.031 | 0.083  | 0.099  | -0.305 | -0.082 | -0.27  | -0.446 | 0.648  | -0.545 | -0.362 |
| 9,11-octadecadienoic acid, methyl ester, (e,e)- | 0.116  | 0.151  | -0.255 | .818*  | .812*  | -0.608 | -0.586 | .707*  | -0.361 | -0.511 | -0.065 | 0.562  | -0.286 | -0.034 | 0.087  |
| (e)-2-dodecenal                                 | -0.225 | -0.13  | -0.215 | -0.423 | -0.391 | -0.35  | -0.368 | -0.195 | 0.302  | 0.385  | -0.358 | 0.412  | -0.071 | 0.393  | 0.088  |
| tert-hexadecanethiol                            | -0.551 | -0.185 | 0.246  | -0.059 | -0.222 | -0.326 | -0.436 | -0.311 | 0.603  | 0.034  | -0.559 | -0.074 | -0.192 | 0.222  | -0.263 |
| hexadecane                                      | 0.369  | 0.183  | 0.126  | -.737* | -0.681 | 0.103  | 0.206  | -0.4   | -0.112 | .709*  | 0.273  | 0.129  | 0.238  | 0.074  | 0.229  |
| 6,10-dimethyl-5,9-undecadien-2-one              | -0.257 | 0.407  | 0.18   | 0.031  | -0.047 | -0.616 | -0.185 | 0.201  | 0.188  | -0.173 | -0.48  | 0.13   | 0.234  | 0.508  | -0.474 |
| estra-1,3,5(10)-trien-17 $\beta$ -ol            | -0.162 | 0.015  | 0.405  | -0.431 | -0.445 | 0.552  | -0.027 | -0.399 | 0.266  | 0.128  | -.721* | -.711* | 0.507  | -0.153 | -0.32  |

<sup>1</sup>\* Correlation is significant at the 0.05 level (two-tailed); \*\* Correlation is significant at the 0.01 level (two-tailed).

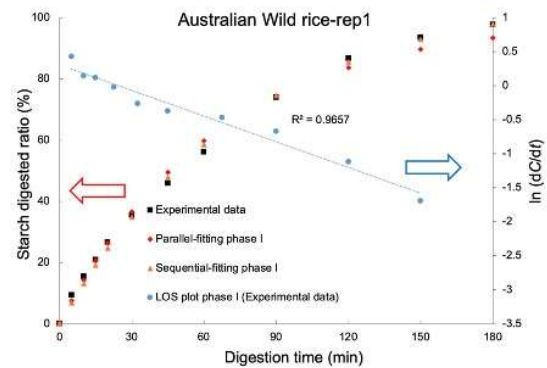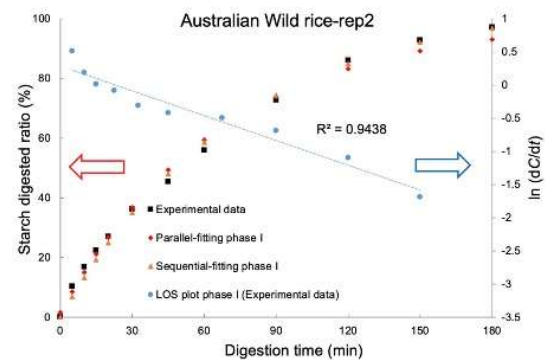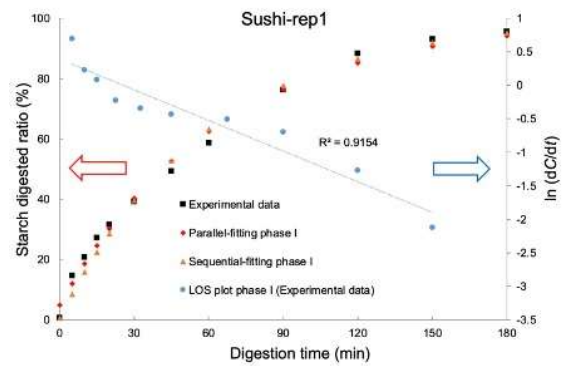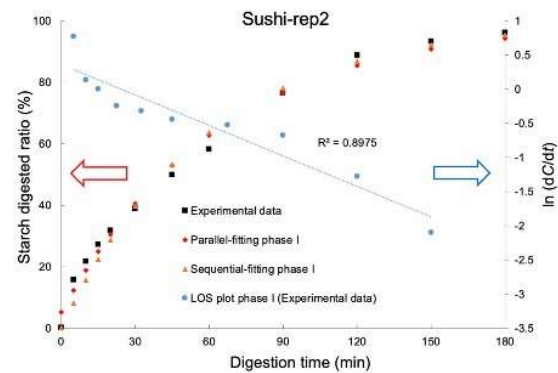



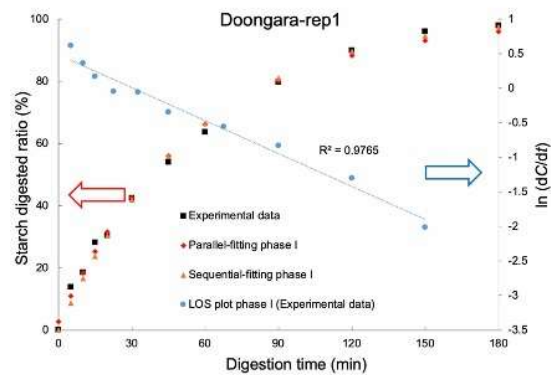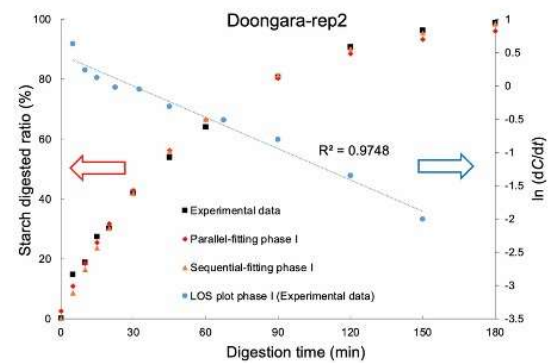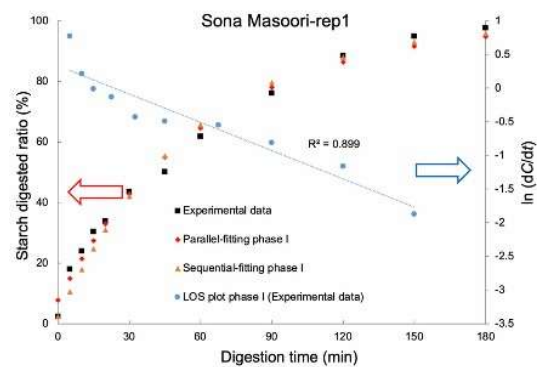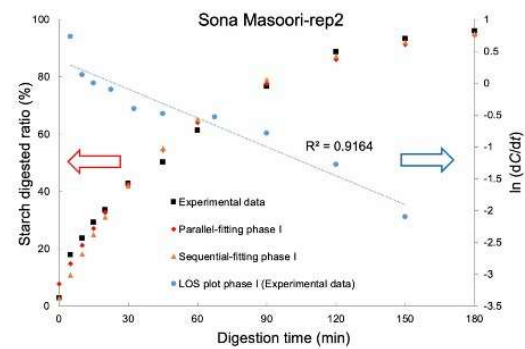

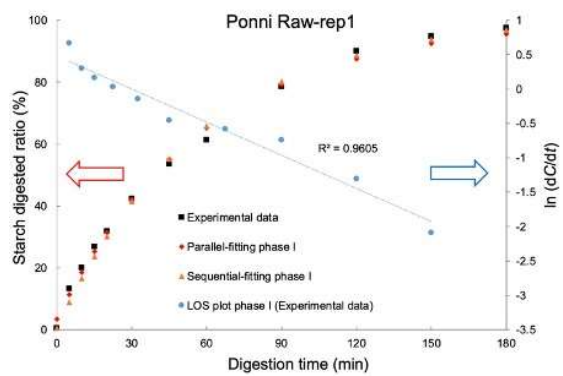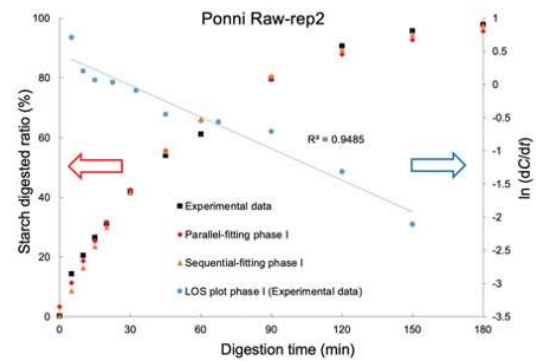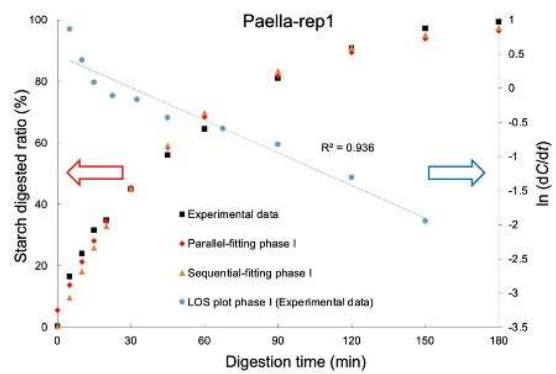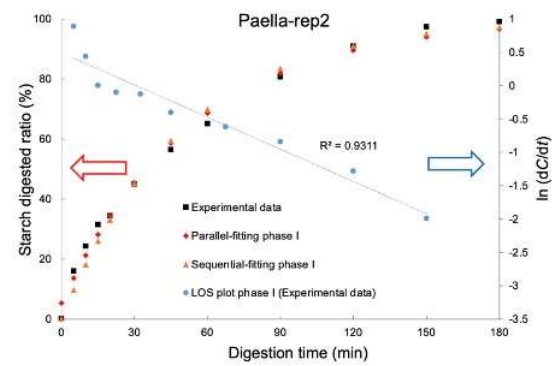

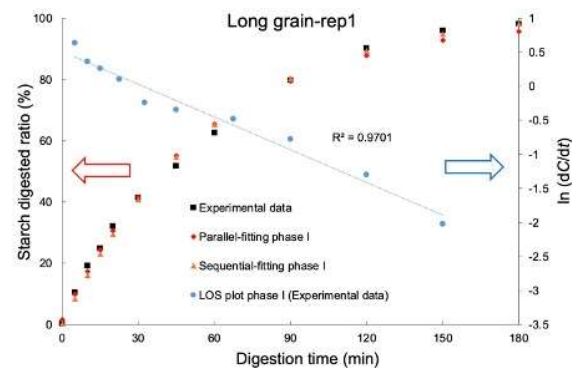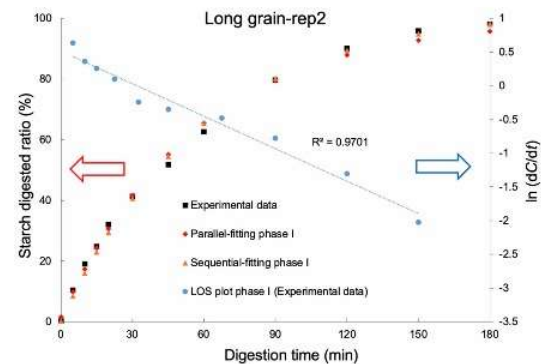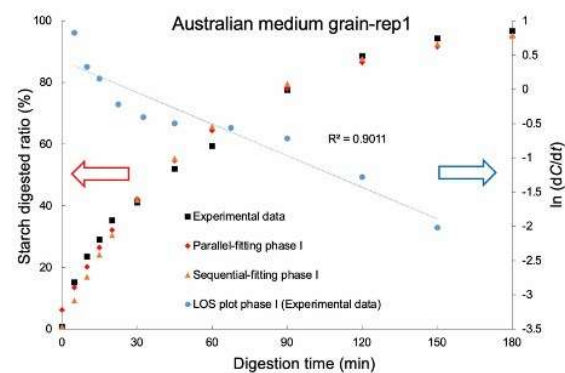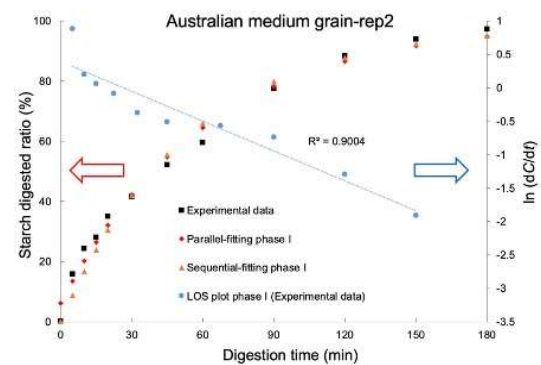

Figure S1. Typical starch digestion curves, model-fit (Parallel-fitting and Sequential-fitting) curves and LOS plots for cooked AWR compared to CRs (Sushi, Doongara, Sona Masoori, Ponni Raw, Paella, Long grain, and Australian Medium grain). Rep1 and rep2 are two replicates.

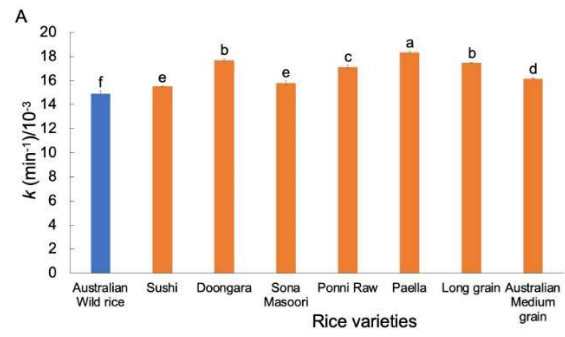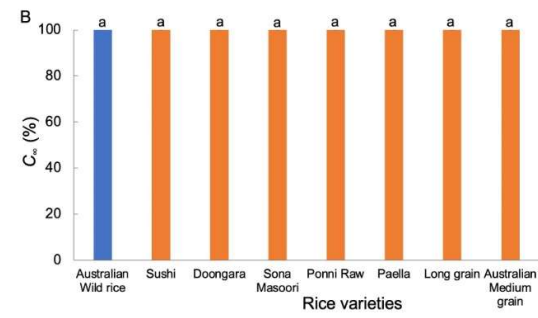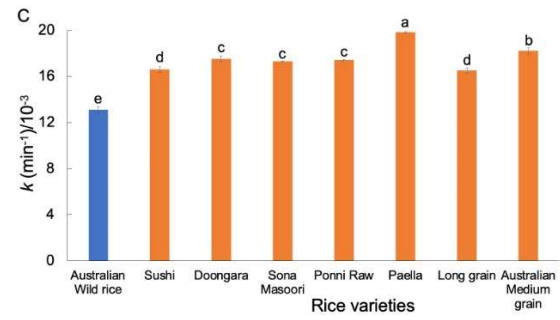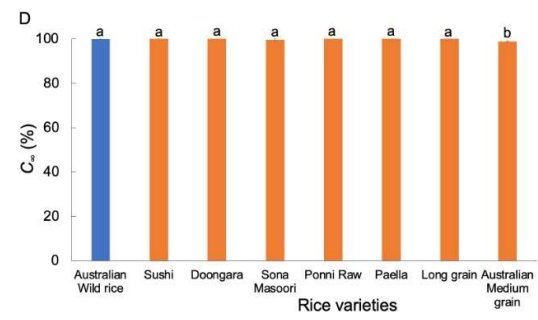

Figure S2. Comparison of in vitro digestibility parameters of AWR and CRs. (A-B) The parameters from Parallel-fitting model; (C-D) The parameters from Sequential-fitting model. Blue and orange: AWR and CRs (Sushi, Doongara, Sona Masoori, Ponni Raw, Paella, Long grain, and Australian Medium grain), respectively. All data were from duplicate measurements. The same letters mean not significant difference ( $p < 0.05$ ).  $k$  is the digestion rate coefficient of starch and  $C_{\infty}$  is the percentage of starch digested by the end of reaction time.

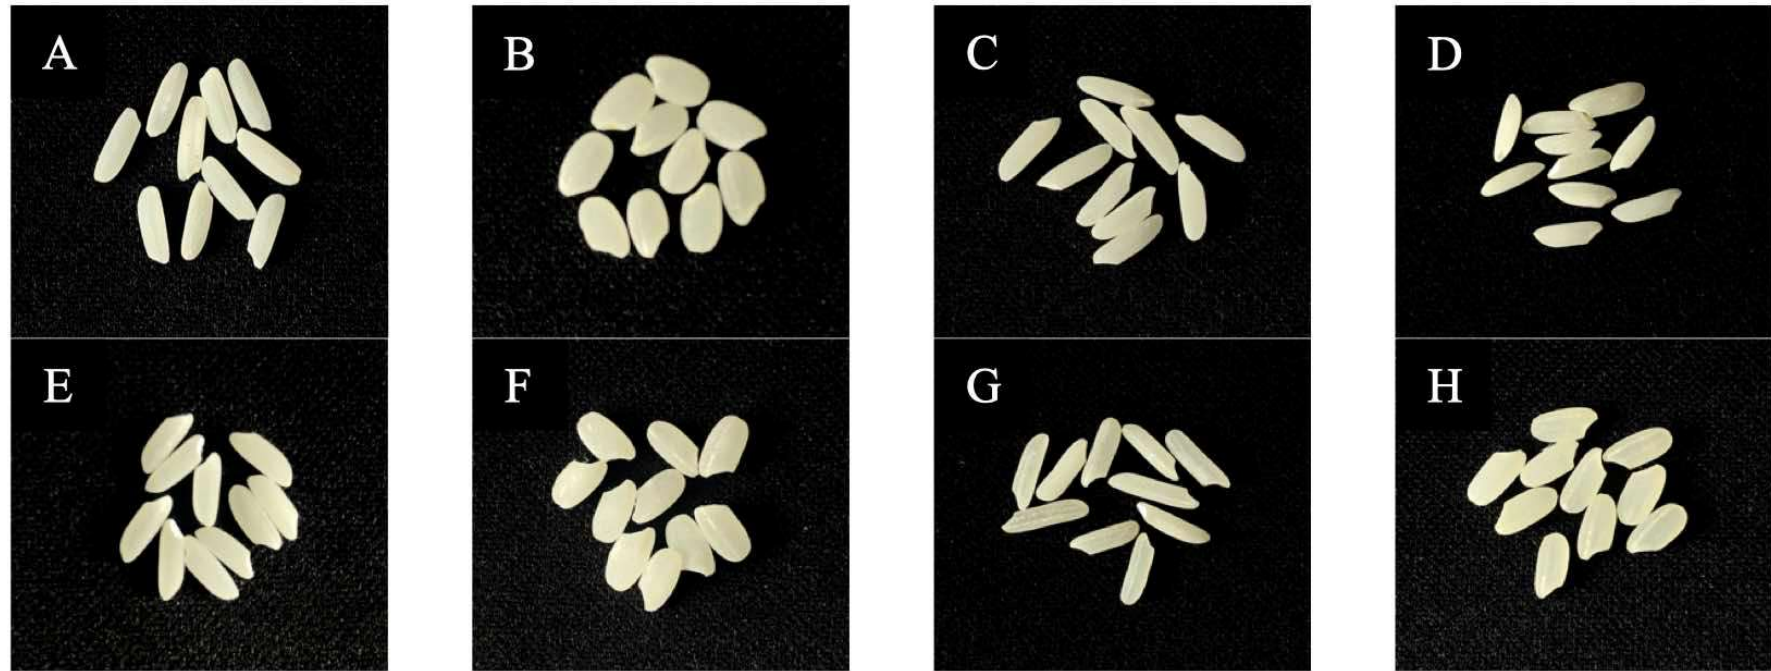

Figure S3. (A-H) The visual pictures of AWR and CRs (Sushi, Doongara, Sona Masoori, Ponni Raw, Paella, Long grain, and Australian Medium grain), respectively.

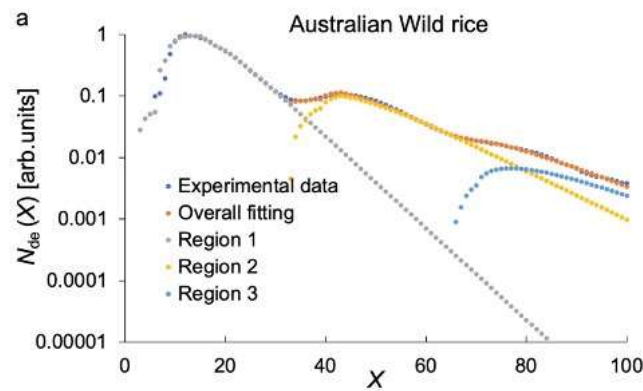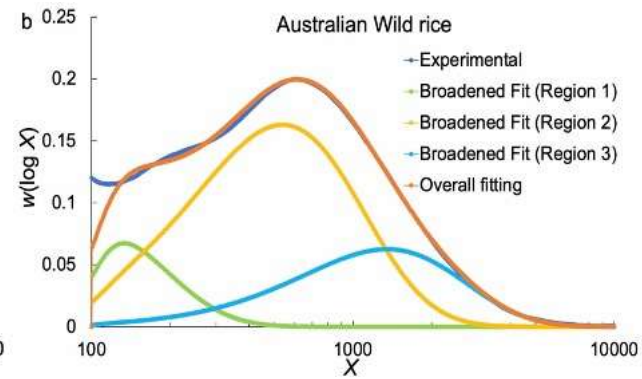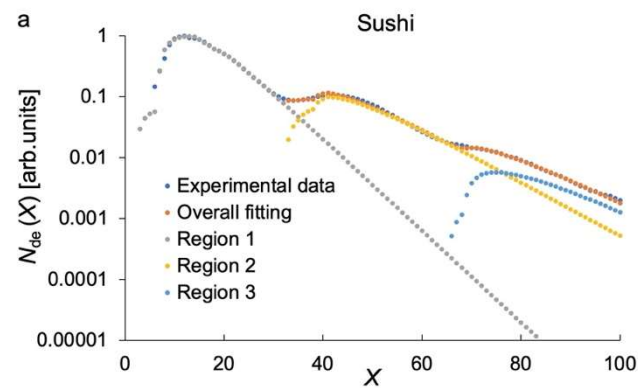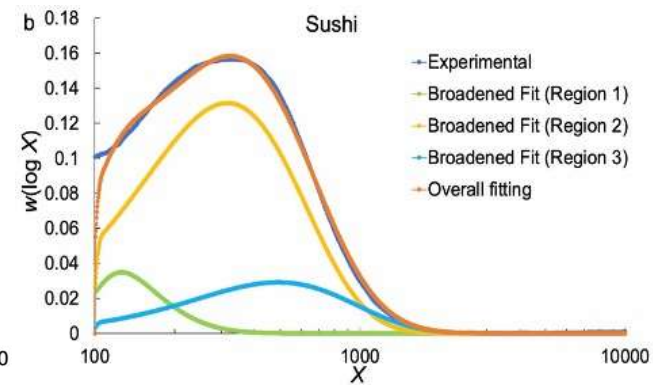

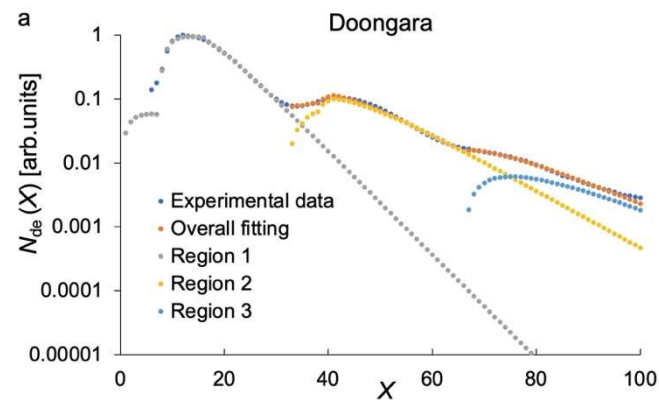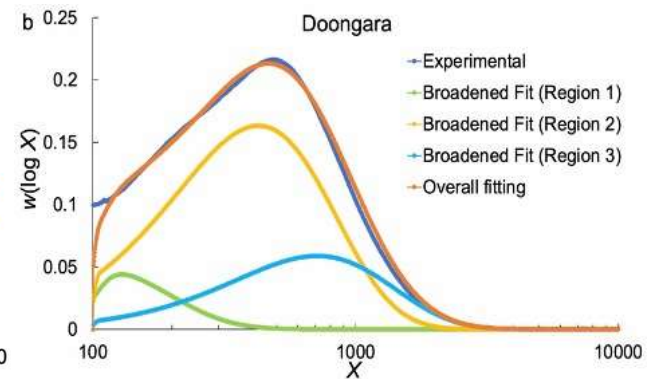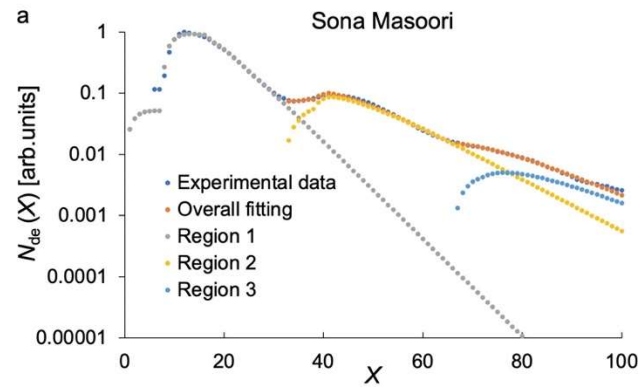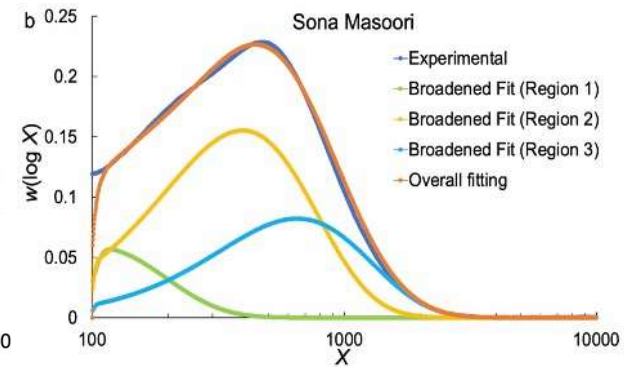



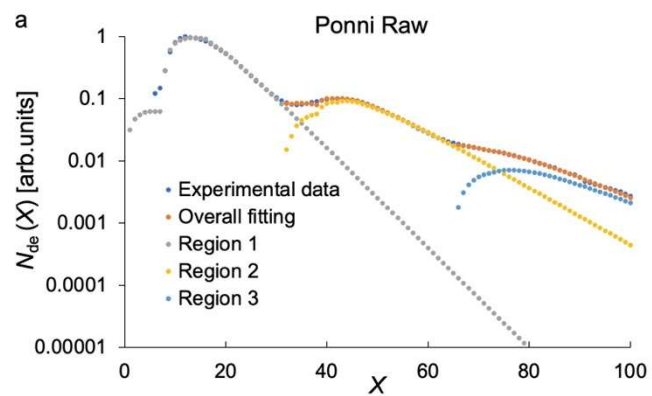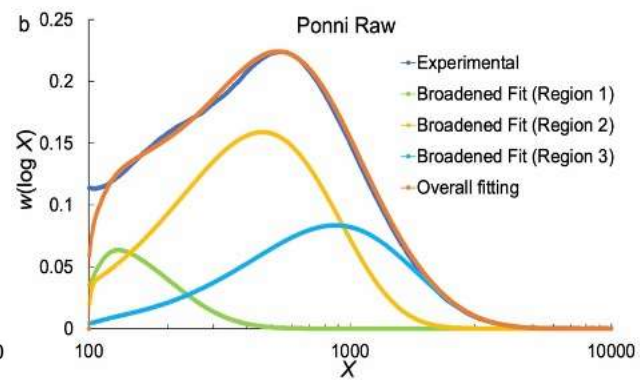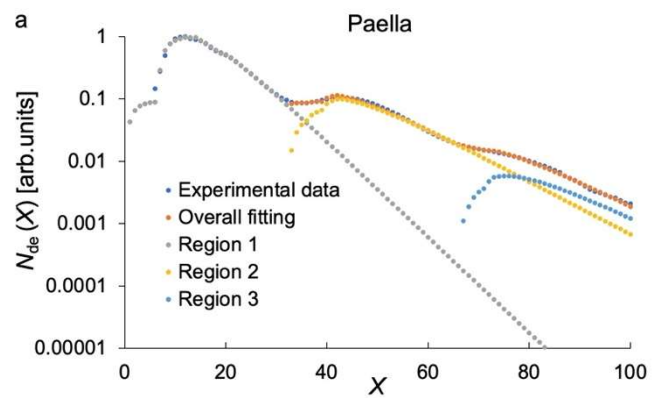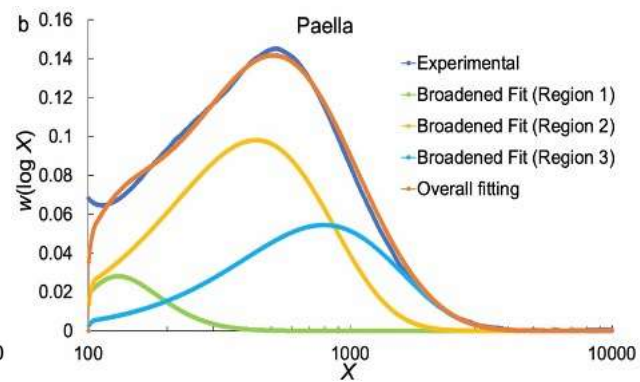



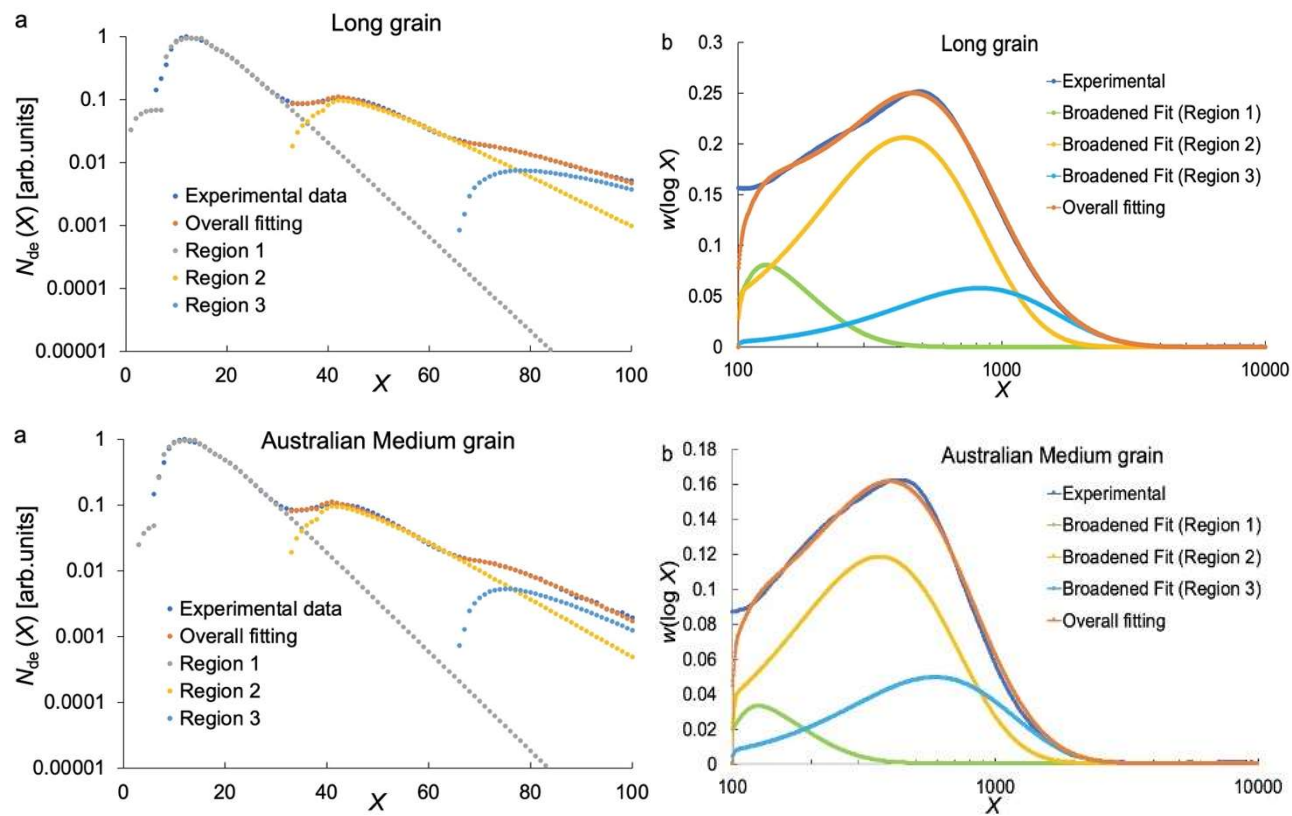

Figure S4. Fitting results of Ap (a) and Am (b) CLD for AWR and CRs (Sushi, Doongara, Sona Masoori, Ponni Raw, Paella, Long grain, and Australian Medium grain).
